# Supplementary material for: Plasma proteome analysis in patients with pulmonary arterial hypertension: an observational cohort study
Source: PubMed Central journal article supplement (PMC5573768; doi:10.1016/s2213-2600(17)30161-3), 2017-09
Supplement: mmc1.pdf [file mmc1.pdf]

# THE LANCET

## Respiratory Medicine

### **Supplementary appendix**

This appendix formed part of the original submission and has been peer reviewed.  
We post it as supplied by the authors.

Supplement to: Rhodes CJ, Wharton J, Ghataorhe P, et al. Plasma proteome analysis in patients with pulmonary arterial hypertension: an observational cohort study. *Lancet Respir Med* 2017; published online June 14. [http://dx.doi.org/10.1016/S2213-2600\(17\)30161-3](http://dx.doi.org/10.1016/S2213-2600(17)30161-3).

## Appendix: online supplement

### Plasma proteome analysis in idiopathic pulmonary arterial hypertension patients stratified by survival: an observational cohort study

Christopher J. Rhodes<sup>1</sup>, John Wharton<sup>1</sup>, Pavandeep Ghataorhe<sup>1</sup>, Geoffrey Watson<sup>1</sup>, Barbara Girerd<sup>6,7,8</sup>, Luke S. Howard<sup>2,3</sup>, J. Simon R. Gibbs<sup>2,3</sup>, Robin Condliffe<sup>5</sup>, Charles A. Elliot<sup>5</sup>, David G. Kiely<sup>5</sup>, Gerald Simonneau<sup>6,7,8</sup>, David Montani<sup>6,7,8</sup>, Olivier Sitbon<sup>6,7,8</sup>, Henning Gall<sup>9</sup>, Ralph T. Schermuly<sup>9</sup>, H. Ardeschir Ghofrani<sup>9</sup>, Allan Lawrie<sup>4</sup>, Marc Humbert<sup>6,7,8</sup>, Martin R. Wilkins<sup>1</sup>

1: Department of Medicine, Imperial College London, Hammersmith Campus, Du Cane Road, London, W12 0NN, UK

2: National Heart and Lung Institute (NHLI), Imperial College London, Hammersmith Campus, Du Cane Road, London, W12 0NN, UK

3: National Pulmonary Hypertension Service, Imperial College Healthcare Trust NHS, Hammersmith Hospital, Du Cane Road, London, W12 0HS, UK

4: Department of Infection, Immunity & Cardiovascular Disease, University of Sheffield, Sheffield, S10 2RX, UK

5: Sheffield Pulmonary Vascular Disease Unit, Royal Hallamshire Hospital, Sheffield, S10 2JF, UK

6. Univ. Paris-Sud, Université Paris-Saclay, Le Kremlin Bicêtre, France;

7. AP-HP, Service de Pneumologie, Hôpital Bicêtre, Le Kremlin Bicêtre, France;

8. Inserm UMR\_S 999, Hôpital Marie Lannelongue, Le Plessis Robinson, France;

9: University of Giessen and Marburg Lung Center (UGMLC), member of the German Center for Lung Research (DZL), Giessen, Germany.

#### Supplementary Materials

eTable 1 – Methodology for quantification of prognostic proteins in plasma.

eTable 2 – Robustness testing of differences in analytes between survivors and non-survivors in cohorts 1 and 2.

eTable 3 – Performance of prognostic analytes by ROC analysis.

eTable 4 - Sensitivity analysis excluding HPAH patients. Discovery and validation comparisons of protein levels in survivors and non-survivors were performed again excluding 7 HPAH cases. Significance of top 20 robustly prognostic proteins (identified by analysis presented in eTable 2) are shown.

eTable 5 – ROC-derived cut-offs for each of the 9 independent, prognostic proteins validated by alternative assays.

eTable 6 - Clinical characteristics of patients whose protein panel scores did or did not increase after initiation of therapy.

eTable 7 - Cox regression models of panel score against established prognostic marker, NT-proBNP.

eFigure 1 - ROC analysis of 2.5 year survival in cohort 2 predicted by the 9 prognostic proteins, either as a simplified score out of 9 based on cut-offs or using an equation which uses the continuous measurements of each protein for each patient.

eFigure 2 – Mean survival estimates in patients from discovery (cohorts 1 and 2) and validation (cohort 4) divided by panel score.

eFigure 3 – ROC analysis of panel score following removal of any 1 or 2 proteins from the scoring.

eFigure 4 – Sub-analysis of protein panel in patients naïve to PAH targeted therapies.

eFigure 5 - Survival by panel score in PAH patients from cohorts 1 and 2 divided by age and bilirubin levels. A. Patients below 50. B. Patients 50 and above. C. Patients with bilirubin levels below 21  $\mu\text{mol/L}$  and D. above 21  $\mu\text{mol/L}$ .

eFigure 6 – ROC analysis of change in panel score, venous oxygen saturations (VenSO<sub>2</sub>), NT-proBNP, pulmonary vascular resistance (PVR) and mean pulmonary artery pressure (PAP) from diagnostic catheterisation to follow-up after initiation of targeted therapies.

eFigure 7 - Calibration plots for Cox models.

eFigure 8 - ROC analysis of panel score added to REVEAL equation or NT-proBNP compared to REVEAL equation alone.

### Supplementary Methodology: Quantification of prognostic panel proteins in plasma samples

Proteins were quantified in plasma samples using the kits described in eTable 1, following the dilution of samples as described.

| Target                                                                                                                                                                                                                                                                                                                                                                                                                                                                                                                                                                                                                                                                                                                                                                                                                                                                                                                                        | Detection       | Dilution | Final volume required/kit | Kits required                   | Sample | Sample Needed | Protocol Makes | Developing time for colour |
|-----------------------------------------------------------------------------------------------------------------------------------------------------------------------------------------------------------------------------------------------------------------------------------------------------------------------------------------------------------------------------------------------------------------------------------------------------------------------------------------------------------------------------------------------------------------------------------------------------------------------------------------------------------------------------------------------------------------------------------------------------------------------------------------------------------------------------------------------------------------------------------------------------------------------------------------------|-----------------|----------|---------------------------|---------------------------------|--------|---------------|----------------|----------------------------|
| Epo                                                                                                                                                                                                                                                                                                                                                                                                                                                                                                                                                                                                                                                                                                                                                                                                                                                                                                                                           | ELISA           | 2        | 100                       | RND: DEP00                      | A      | 100           | 125            | 35                         |
| BNP                                                                                                                                                                                                                                                                                                                                                                                                                                                                                                                                                                                                                                                                                                                                                                                                                                                                                                                                           | Clinical assays | 10       | 100                       | Clinical assays                 | B      | 100           | 125            |                            |
| Leptin<br>IGFBP-1                                                                                                                                                                                                                                                                                                                                                                                                                                                                                                                                                                                                                                                                                                                                                                                                                                                                                                                             | Luminex         | 20       | 50                        | RND: custom<br>LXSAHM-02        | C      | 50            | 300            |                            |
| IL-1 R4/ST2                                                                                                                                                                                                                                                                                                                                                                                                                                                                                                                                                                                                                                                                                                                                                                                                                                                                                                                                   | ELISA           | 50       | 50                        | RND: DST200                     | D      | 50            | 450            | 25                         |
| TIMP-1<br>TIMP-2                                                                                                                                                                                                                                                                                                                                                                                                                                                                                                                                                                                                                                                                                                                                                                                                                                                                                                                              | Luminex         | 400      | 100                       | LKTM003 Luminex<br>kit from RND | E      | 100           | 300            |                            |
| Apo E                                                                                                                                                                                                                                                                                                                                                                                                                                                                                                                                                                                                                                                                                                                                                                                                                                                                                                                                         | ELISA           | 2000     | 50                        | RND: DAPE00                     | F      | 50            | 400            | 60                         |
| Factor D                                                                                                                                                                                                                                                                                                                                                                                                                                                                                                                                                                                                                                                                                                                                                                                                                                                                                                                                      | DuoSet          | 10000    | 100                       | RND: DY1824                     | G      | 100           | 350            | 8                          |
| Plasminogen                                                                                                                                                                                                                                                                                                                                                                                                                                                                                                                                                                                                                                                                                                                                                                                                                                                                                                                                   | ELISA           | 30000    | 50                        | Universal Bio<br>EP1200-1       | H      | 150           | 450            | 10                         |
| Factor H                                                                                                                                                                                                                                                                                                                                                                                                                                                                                                                                                                                                                                                                                                                                                                                                                                                                                                                                      | DuoSet          |          | 100                       | RND: DY4779                     |        |               |                | 20                         |
| <p>A - Dilute 100 µl of plasma with 100 µl of reagent diluent from RND to make 200 µl of 2X A</p> <p>B - Dilute 25 µl of A with 100 µl of diluent to make 125 µl of 10X B</p> <p>C - Dilute 50 µl of A with 450 µl of diluent to make 500 µl of 20X C</p> <p>D - Dilute 200 µl of C with 300 µl of diluent to make 500 µl of 50X D</p> <p>E - Dilute 50 µl of D with 350 µl of diluent to make 400 µl of 400X E</p> <p>F - Dilute 100 µl of E with 400 µl of diluent to make 500 µl of 2000X F</p> <p>G - Dilute 100 µl of F with 400 µl of diluent to make 500 µl of 10,000X G</p> <p>H - Dilute 150 µl of G with 300 µl of diluent to make 450 µl of 30,000X H</p> <p>Kits for ASAH2 (antibodies-online GmbH, Aachen, Germany, ABIN420312), BMP-1 (ABIN416985), XEDAR (RND/BioTechne, Abingdon, UK, DY1093), Pre-kallikrein (ABIN578408), CNDP1 (ABIN421005) were tested but results did not correlate with the proteomic measurements.</p> |                 |          |                           |                                 |        |               |                |                            |

eTable 1 – Methodology for quantification of prognostic proteins in plasma.

| Proteins                       | Differences in median protein expression between survivors and non-survivors |         |          |          | p<0.05 in analyses |              |           |
|--------------------------------|------------------------------------------------------------------------------|---------|----------|----------|--------------------|--------------|-----------|
|                                | Cohort 1                                                                     | Sig.    | Cohort 2 | Sig.     | Cohort 1 /18       | Cohort 2 /18 | Total /36 |
| <b>BNP-32</b>                  | 0.17                                                                         | 0.0002  | 0.12     | 0.00002  | <b>18</b>          | <b>18</b>    | <b>36</b> |
| <b>IL-1 R4</b>                 | 0.20                                                                         | 0.0022  | 0.30     | 0.000004 | <b>18</b>          | <b>18</b>    | <b>36</b> |
| <b>TIMP-1</b>                  | 0.11                                                                         | 0.0011  | 0.18     | 0.00001  | <b>18</b>          | <b>18</b>    | <b>36</b> |
| <b>Growth hormone receptor</b> | -0.16                                                                        | 0.0012  | -0.16    | 0.00003  | <b>18</b>          | <b>18</b>    | <b>36</b> |
| <b>Plasminogen</b>             | -0.07                                                                        | 0.0003  | -0.07    | 0.0002   | <b>18</b>          | <b>18</b>    | <b>36</b> |
| <b>BMP-1</b>                   | -0.16                                                                        | 0.0005  | -0.13    | 0.0002   | <b>18</b>          | <b>18</b>    | <b>36</b> |
| <b>Prekallikrein</b>           | -0.09                                                                        | 0.00004 | -0.06    | 0.0022   | <b>18</b>          | <b>18</b>    | <b>36</b> |
| <b>RET</b>                     | -0.11                                                                        | 0.0001  | -0.11    | 0.0007   | <b>18</b>          | <b>18</b>    | <b>36</b> |
| <b>CNDP1</b>                   | -0.24                                                                        | 0.0002  | -0.17    | 0.0009   | <b>18</b>          | <b>18</b>    | <b>36</b> |
| <b>TIMP-2</b>                  | 0.07                                                                         | 0.0026  | 0.10     | 0.0001   | <b>18</b>          | <b>18</b>    | <b>36</b> |
| <b>Leptin</b>                  | -0.23                                                                        | 0.0011  | -0.21    | 0.0046   | <b>18</b>          | <b>18</b>    | <b>36</b> |
| <b>Factor D</b>                | 0.06                                                                         | 0.0023  | 0.04     | 0.0038   | <b>18</b>          | <b>18</b>    | <b>36</b> |
| <b>Apo E</b>                   | -0.17                                                                        | 0.0002  | -0.12    | 0.0066   | <b>18</b>          | <b>17</b>    | <b>35</b> |
| <b>NRP1</b>                    | 0.07                                                                         | 0.0012  | 0.05     | 0.0063   | <b>18</b>          | <b>17</b>    | <b>35</b> |
| <b>a1-Antitrypsin</b>          | 0.10                                                                         | 0.0034  | 0.09     | 0.0029   | <b>17</b>          | <b>18</b>    | <b>35</b> |
| <b>Epo</b>                     | 0.15                                                                         | 0.0002  | 0.11     | 0.0135   | <b>18</b>          | <b>16</b>    | <b>34</b> |
| <b>IGFBP-1</b>                 | 0.18                                                                         | 0.0069  | 0.20     | 0.0027   | <b>16</b>          | <b>18</b>    | <b>34</b> |
| <b>XEDAR</b>                   | 0.12                                                                         | 0.0086  | 0.18     | 0.000004 | <b>15</b>          | <b>18</b>    | <b>33</b> |
| <b>Factor H</b>                | -0.05                                                                        | 0.0005  | -0.03    | 0.0120   | <b>18</b>          | <b>15</b>    | <b>33</b> |
| <b>ASAH2</b>                   | -0.15                                                                        | 0.0112  | -0.14    | 0.0030   | <b>16</b>          | <b>17</b>    | <b>33</b> |
| Factor B                       | -0.05                                                                        | 0.0142  | -0.04    | 0.0034   | 13                 | 18           | 31        |
| PTN                            | 0.07                                                                         | 0.0185  | 0.14     | 0.0001   | 12                 | 18           | 30        |
| Apo E3                         | -0.15                                                                        | 0.0003  | -0.08    | 0.0273   | 18                 | 12           | 30        |
| IL-2 sRa                       | 0.12                                                                         | 0.0051  | 0.05     | 0.0272   | 17                 | 10           | 27        |
| PARC                           | 0.11                                                                         | 0.0412  | 0.16     | 0.0067   | 9                  | 18           | 27        |
| a2-Antiplasmin                 | -0.04                                                                        | 0.0391  | -0.05    | 0.0028   | 8                  | 18           | 26        |
| Kallikrein 7                   | -0.12                                                                        | 0.0029  | -0.07    | 0.0473   | 18                 | 8            | 26        |
| Angiogenin                     | 0.06                                                                         | 0.0173  | 0.07     | 0.0089   | 13                 | 13           | 26        |
| Afamin                         | -0.05                                                                        | 0.0225  | -0.07    | 0.0157   | 9                  | 16           | 25        |
| C3b                            | -0.14                                                                        | 0.0276  | -0.27    | 0.0141   | 9                  | 16           | 25        |
| ENTP5                          | -0.09                                                                        | 0.0008  | -0.05    | 0.0416   | 18                 | 6            | 24        |
| TFF3                           | 0.12                                                                         | 0.0486  | 0.12     | 0.0039   | 6                  | 18           | 24        |
| WKFN1                          | -0.09                                                                        | 0.0094  | -0.06    | 0.0293   | 14                 | 10           | 24        |
| Angiopoietin-2                 | 0.10                                                                         | 0.0337  | 0.16     | 0.0099   | 8                  | 16           | 24        |
| Coagulation Factor V           | -0.09                                                                        | 0.0100  | -0.09    | 0.0368   | 16                 | 8            | 24        |
| C7                             | 0.07                                                                         | 0.0493  | 0.11     | 0.0018   | 5                  | 18           | 23        |
| Properdin                      | -0.06                                                                        | 0.0285  | -0.09    | 0.0171   | 10                 | 11           | 21        |
| IL-22BP                        | -0.11                                                                        | 0.0160  | -0.11    | 0.0289   | 12                 | 8            | 20        |
| PCI                            | -0.05                                                                        | 0.0415  | -0.07    | 0.0499   | 7                  | 7            | 14        |
| CDON                           | -0.07                                                                        | 0.0347  | -0.06    | 0.0499   | 6                  | 6            | 12        |

eTable 2 – Robustness testing of differences in analytes between survivors and non-survivors in IPAH cohorts 1 and 2. To assess robustness of differences in analytes between survivors and non-survivors in these cohorts, 18 re-sampling analyses were performed, repeating the analysis each time removing 1/6 of patients in 3 randomised blocks, such that each sample was left out of 3 analyses. Proteins were then ranked by the number of times they met a p-value of <0.05 and those that were found significant in at least 33/36 analyses were selected for further study.

| Test Result Variable(s)                 | Cohort 1 |       |         | Cohort 2 |       |         |
|-----------------------------------------|----------|-------|---------|----------|-------|---------|
|                                         | Area     | SEM   | Sig.    | Area     | SEM   | Sig.    |
| <b>Higher value indicates mortality</b> |          |       |         |          |       |         |
| BNP32                                   | 0.774    | 0.063 | 0.0002  | 0.787    | 0.055 | 1.9E-05 |
| ST2                                     | 0.724    | 0.067 | 0.0022  | 0.806    | 0.049 | 5.2E-06 |
| TIMP1                                   | 0.738    | 0.059 | 0.0011  | 0.792    | 0.052 | 1.4E-05 |
| XEDAR                                   | 0.692    | 0.063 | 0.0086  | 0.809    | 0.051 | 4.0E-06 |
| TIMP2                                   | 0.720    | 0.062 | 0.0026  | 0.766    | 0.056 | 7.6E-05 |
| Epo                                     | 0.774    | 0.061 | 0.0002  | 0.666    | 0.063 | 0.0131  |
| NRP1                                    | 0.736    | 0.052 | 0.0012  | 0.683    | 0.063 | 0.0063  |
| FactorD                                 | 0.722    | 0.055 | 0.0023  | 0.695    | 0.062 | 0.0036  |
| a1Antitrypsin                           | 0.714    | 0.071 | 0.0034  | 0.700    | 0.062 | 0.0029  |
| IGFBP1                                  | 0.697    | 0.067 | 0.0069  | 0.701    | 0.061 | 0.0028  |
| <b>Lower value indicates mortality</b>  |          |       |         |          |       |         |
| Growth hormone receptor                 | 0.736    | 0.067 | 0.0012  | 0.779    | 0.055 | 0.0000  |
| Plasminogen                             | 0.767    | 0.058 | 0.0003  | 0.752    | 0.057 | 0.0002  |
| BMP1                                    | 0.754    | 0.060 | 0.0005  | 0.754    | 0.056 | 0.0002  |
| Prekallikrein                           | 0.800    | 0.057 | 3.9E-05 | 0.706    | 0.061 | 0.0022  |
| RET                                     | 0.780    | 0.061 | 0.0001  | 0.727    | 0.059 | 0.0007  |
| CNDP1                                   | 0.775    | 0.061 | 0.0002  | 0.722    | 0.063 | 0.0009  |
| ApoE                                    | 0.773    | 0.058 | 0.0002  | 0.684    | 0.062 | 0.0061  |
| Leptin                                  | 0.739    | 0.061 | 0.0011  | 0.689    | 0.061 | 0.0048  |
| FactorH                                 | 0.754    | 0.063 | 0.0005  | 0.669    | 0.063 | 0.0120  |
| ASAH2                                   | 0.685    | 0.065 | 0.0112  | 0.700    | 0.061 | 0.0029  |

eTable 3 – Performance of prognostic analytes by ROC analysis.

Significance: Survivors vs non-survivors

| Proteins                | Cohort 1 | Cohort 2 |
|-------------------------|----------|----------|
| BNP-32                  | 0.000132 | 1.81E-05 |
| IL-1 R4                 | 0.003625 | 1.46E-06 |
| TIMP-1                  | 0.002162 | 5.16E-05 |
| Growth hormone receptor | 0.002795 | 5.56E-05 |
| Plasminogen             | 0.005992 | 0.000662 |
| BMP-1                   | 0.009586 | 0.000685 |
| Prekallikrein           | 0.001615 | 0.005796 |
| RET                     | 0.001488 | 0.000817 |
| CNDP1                   | 0.000428 | 0.001721 |
| TIMP-2                  | 0.002017 | 0.000101 |
| Leptin                  | 0.003521 | 0.003724 |
| Factor D                | 0.005622 | 0.008352 |
| Apo E                   | 0.000742 | 0.004597 |
| NRP1                    | 0.002535 | 0.015836 |
| $\alpha$ 1-Antitrypsin  | 0.004298 | 0.005691 |
| Epo                     | 0.000236 | 0.026144 |
| IGFBP-1                 | 0.006922 | 0.003441 |
| XEDAR                   | 0.041376 | 9.73E-06 |
| Factor H                | 0.002662 | 0.008311 |
| ASAH2                   | 0.0073   | 0.007768 |

eTable 4 - Sensitivity analysis excluding HPAH patients. Discovery and validation comparisons of protein levels in survivors and non-survivors were performed again excluding 7 HPAH cases. Significance of top 20 robustly prognostic proteins (identified by analysis presented in eTable 2) are shown.

| Analyte                                              | Percentile of cut-off<br>in discovery<br>IPAH cohorts 1+2 | Equivalent concentration from lab<br>assays in validation IPAH cohort 4 |
|------------------------------------------------------|-----------------------------------------------------------|-------------------------------------------------------------------------|
| <b>Reduction in protein indicates increased risk</b> |                                                           |                                                                         |
| Apo E                                                | 0.454                                                     | 38.13 ug/ml                                                             |
| Factor H                                             | 0.463                                                     | 263.7 ug/ml                                                             |
| Plasminogen                                          | 0.514                                                     | 420.9 ug/ml                                                             |
| <b>Increase in protein indicates increased risk</b>  |                                                           |                                                                         |
| Epo                                                  | 0.674                                                     | 31.91 mIU/ml                                                            |
| Factor D                                             | 0.537                                                     | 1733 ng/ml                                                              |
| IGFBP-1                                              | 0.697                                                     | 26.94 ng/ml                                                             |
| ST2                                                  | 0.807                                                     | 43.09 ng/ml                                                             |
| TIMP-1                                               | 0.312                                                     | 138.9 ng/ml                                                             |
| TIMP-2                                               | 0.638                                                     | 357.9 ng/ml                                                             |

eTable 5 – ROC-derived cut-offs for each of the 9 independent, prognostic proteins validated by alternative assays. Concentrations were derived from percentile of ROC-derived cut-off in SomaScan data, i.e. if the optimal cut-off in the SomaScan data indicated 60% of patients with highest levels of the marker were at risk, the value identifying the top 60% of patients determined by the equivalent lab assay is given.



|                                              | Change in Panel score       |                       | Sig. |
|----------------------------------------------|-----------------------------|-----------------------|------|
|                                              | No increase                 | Increase              |      |
|                                              | Median (IQR) or frequencies |                       |      |
| Age at diagnosis                             | 43.2 (30.0 - 57.0)          | 52.3 (29.3 - 63.2)    | 0.43 |
| Mean pulmonary artery pressure, mmHg         | 53.3 (45.3 - 59.8)          | 47 (41 - 51)          | 0.74 |
| Pulmonary vascular resistance, dynes/cm5/min | 1071.6 (781.8 - 1216.8)     | 678.2 (524.8 - 921.2) | 0.17 |
| Venous oxygen saturations, %                 | 60 (56.5 - 63.8)            | 62.9 (52.5 - 68.3)    | 0.29 |
| Mean right atrial pressure, mmHg             | 7.5 (3 - 11)                | 6 (4 - 7)             | 0.66 |
| Cardiac index, L/min/kg/m2                   | 2.17 (1.6 - 2.6)            | 2.17 (2.0 - 2.6)      | 0.24 |
| Pulmonary artery wedge pressure, mmHg        | 7 (4 - 9)                   | 9 (6 - 10)            | 0.43 |
| NYHA Functional Class, II / III / IV         | 5 / 17 / 6                  | 1 / 11 / 3            | 0.83 |
| Single/combination therapy                   | 25/3                        | 15/0                  | 0.19 |

eTable 6 - Clinical characteristics of patients whose protein panel scores did or did not increase after initiation of therapy.

|                                    | Hazard ratio | 95% CI      | Sig.  |
|------------------------------------|--------------|-------------|-------|
| <b>Development (Cohorts 1 + 2)</b> |              |             |       |
| Panel of 9 proteins                | 2.64         | 1.94 - 3.58 | 6E-10 |
| NT-proBNP                          | 1.49         | 1.16 - 1.91 | 0.002 |
| <b>Validation (Cohort 4)</b>       |              |             |       |
| Panel of 9 proteins                | 1.94         | 1.27 - 2.98 | 0.002 |
| NT-proBNP                          | 1.37         | 0.95 - 1.98 | 0.096 |

eTable 7 - Cox regression models of panel score against established prognostic marker, NT-proBNP.

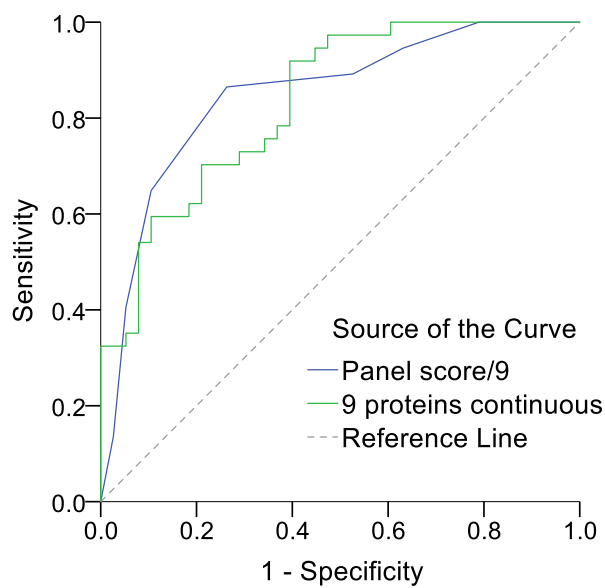

| Test Result Variable(s) | Area | Sig.     | 95% CI |      |
|-------------------------|------|----------|--------|------|
| Panel score/9           | 0.85 | 2.13E-07 | 0.76   | 0.94 |
| 9 proteins continuous   | 0.83 | 6.34E-07 | 0.75   | 0.92 |

eFigure 1 - ROC analysis of 2.5 year survival in cohort 2 predicted by the 9 prognostic proteins, either as a simplified score out of 9 based on cut-offs or using an equation which uses the continuous measurements of each protein for each patient.

**A** Mean survival in cohorts 1+2 by score    **B** Survival by panel score in cohort 4

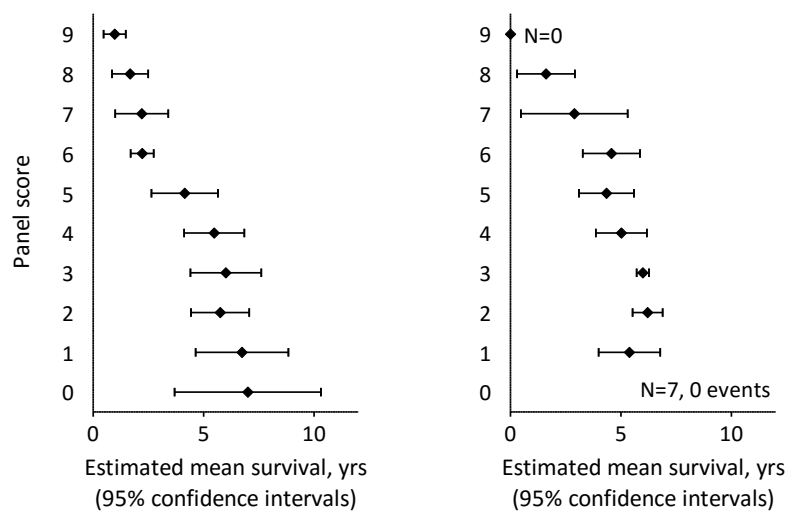

eFigure 2 – Mean survival estimates in patients from A. discovery (cohorts 1 and 2) and B. validation (cohort 4) divided by panel score.

### Prognostic performance of the panel score after removing single variables

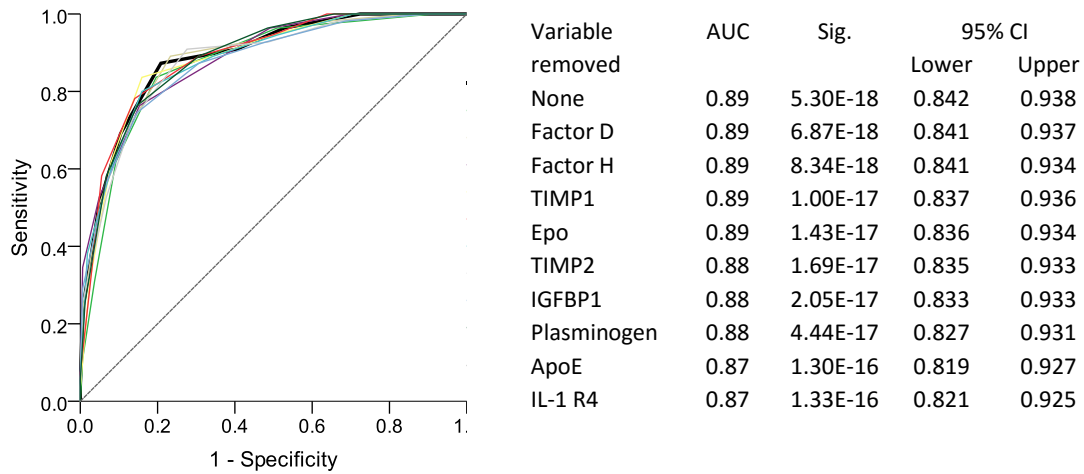

### Prognostic performance of the panel score after removing two variables

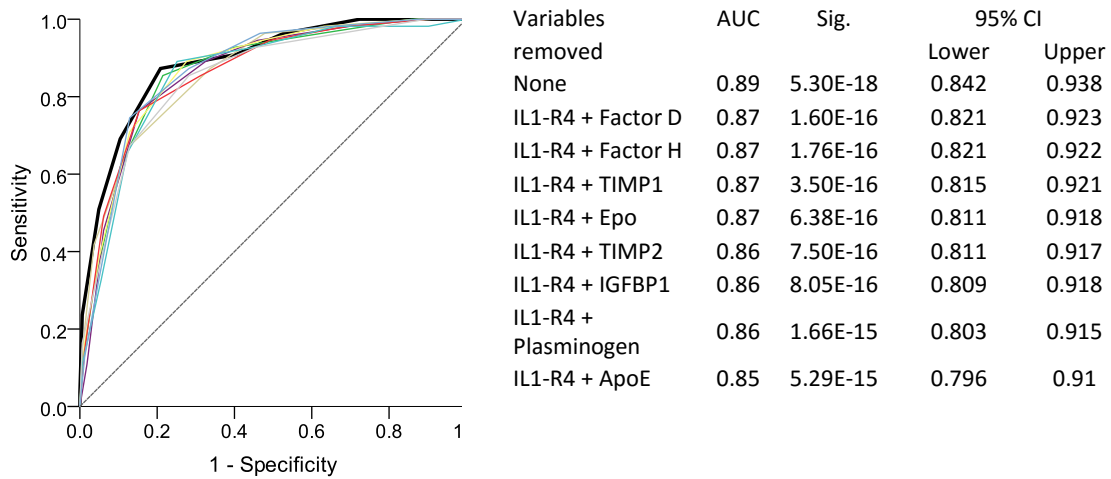

eFigure 3 – ROC analysis of panel score following removal of any 1 or 2 proteins from the scoring.

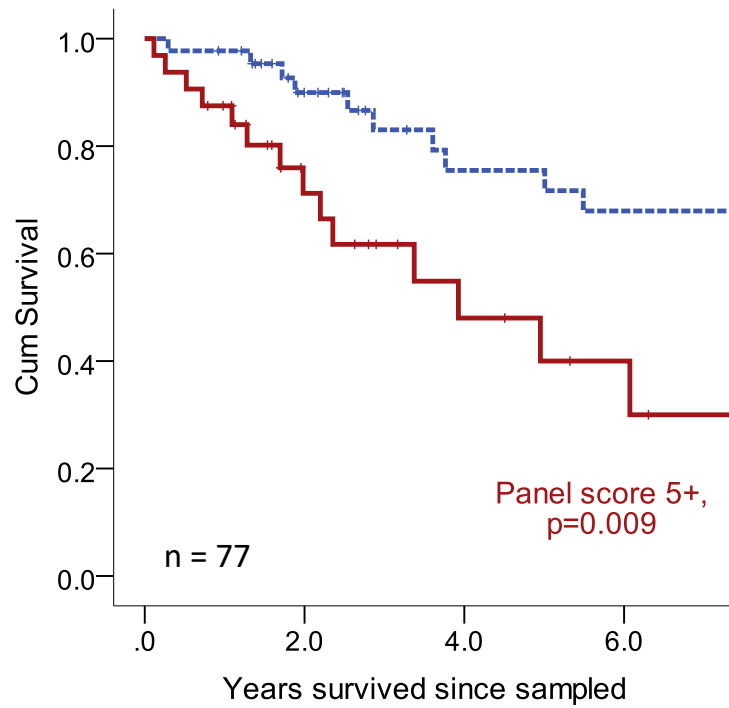

eFigure 4 – Sub-analysis of protein panel in patients naïve to PAH targeted therapies. 40 additional samples from patients in Cohort 1 before they commenced therapy were analysed in addition to the patients already analysed before therapy. Kaplan-Meier analysis shows estimated survival over time in treatment-naïve IPAH patients divided by panel score.

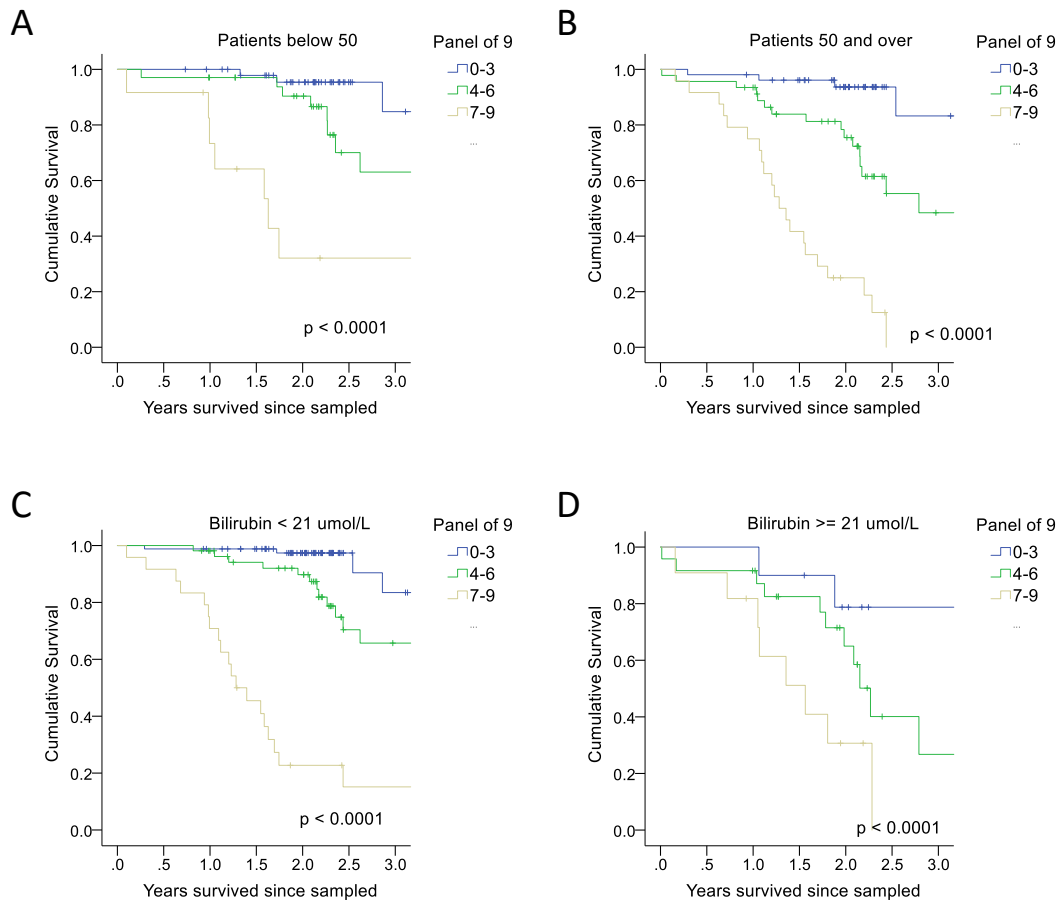

eFigure 5 - Survival by panel score in PAH patients from cohorts 1 and 2 divided by age and bilirubin levels. A. Patients below 50. B. Patients 50 and above. C. Patients with bilirubin levels below 21  $\mu\text{mol/L}$  and D. above 21  $\mu\text{mol/L}$ .

## Prognostic performance of changes in variables measured at diagnostic and follow-up catheterisations

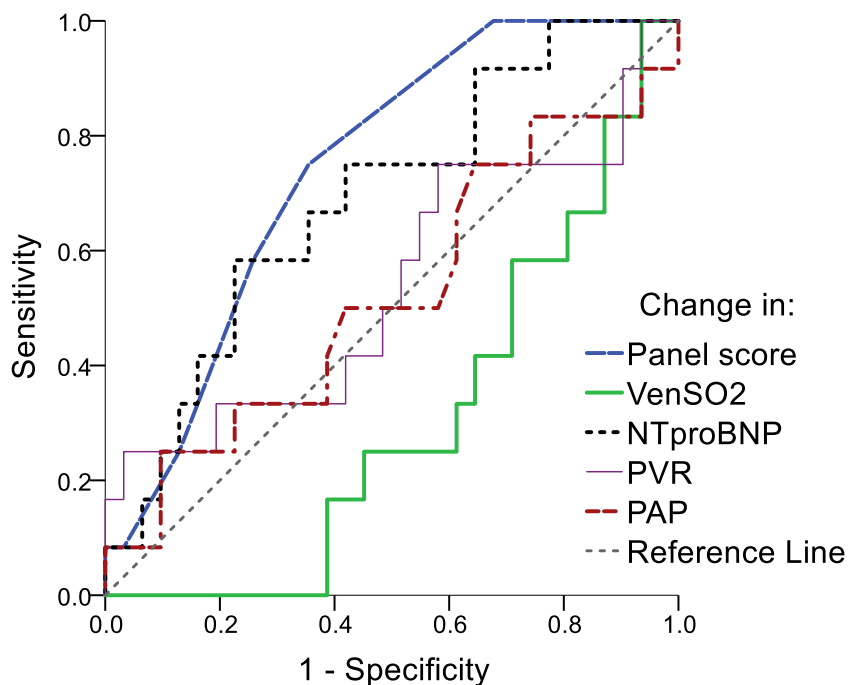

| Change in:      | AUC   | Sig.  | 95% CI      |
|-----------------|-------|-------|-------------|
| Panel score     | 0.742 | 0.015 | 0.59 - 0.89 |
| VenSO2          | 0.306 | 0.051 | 0.15 - 0.47 |
| NTproBNP pmol/L | 0.688 | 0.058 | 0.52 - 0.86 |
| PVR             | 0.54  | 0.685 | 0.33 - 0.75 |
| PAP             | 0.523 | 0.818 | 0.32 - 0.73 |

eFigure 6 – ROC analysis of change in panel score, venous oxygen saturations (VenSO<sub>2</sub>), NT-proBNP, pulmonary vascular resistance (PVR) and mean pulmonary artery pressure (PAP) from diagnostic catheterisation to follow-up after initiation of targeted therapies.

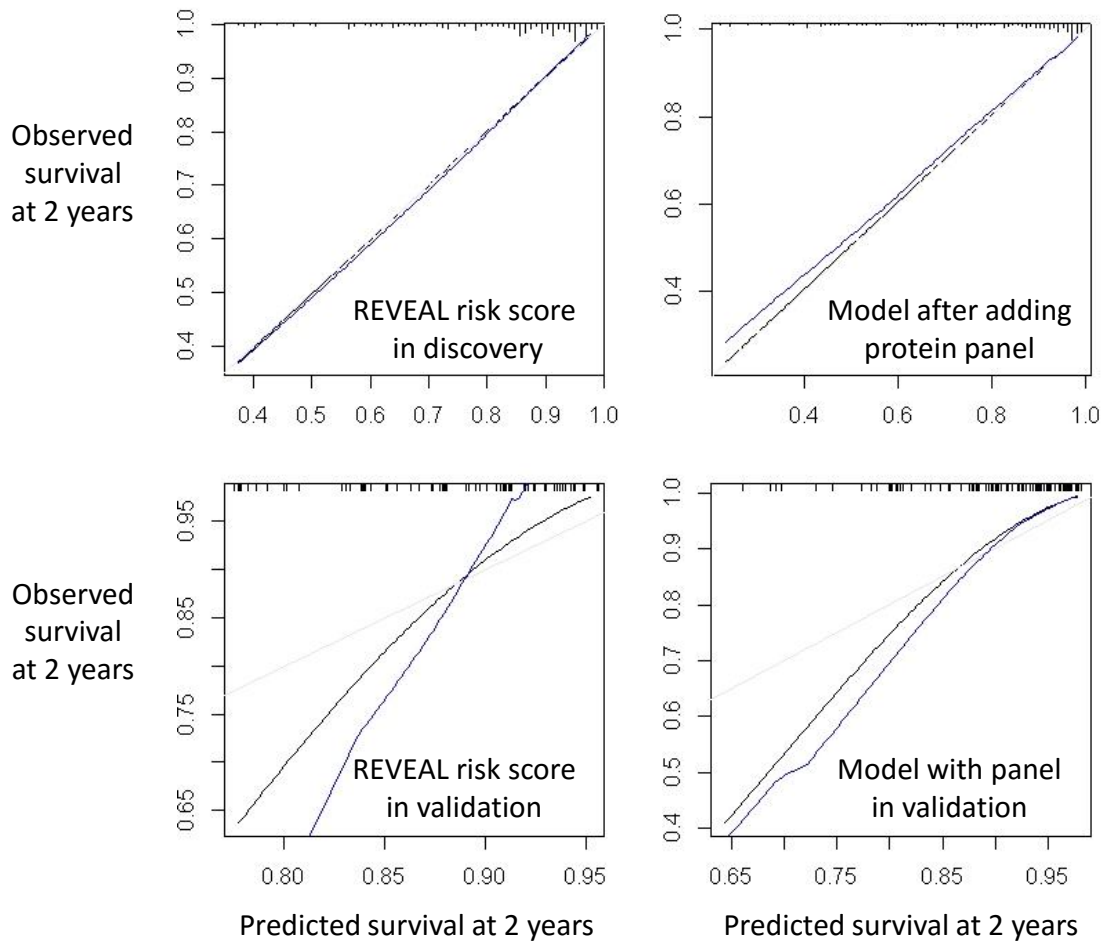

eFigure 7 - Calibration plots for Cox models. Each plot indicates the calibration between predicted and expected mortality at 2 years before (black) and after (blue) correcting for optimism. The grey line in each plot indicates the ideal of observed=predicted. The dashes at the top of each plot indicate predicted mortality for individuals included in the study. The validation plots are slightly skewed at lower predicted risks where there were few patients.



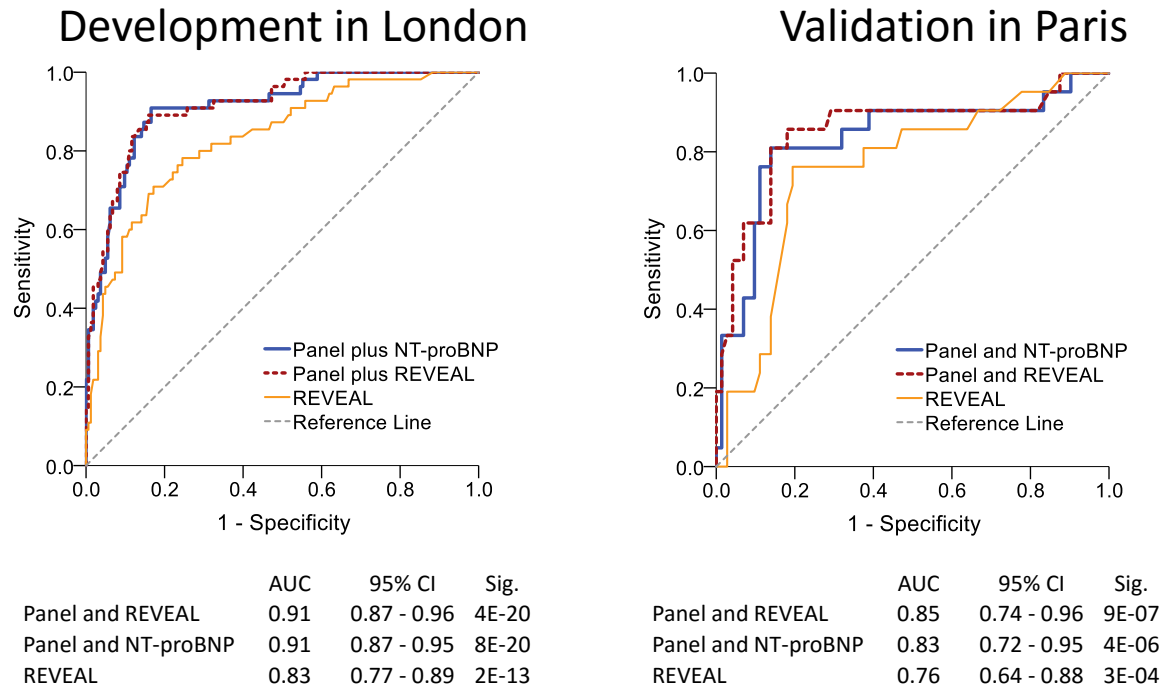

eFigure 8 - ROC analysis of panel score added to REVEAL equation or NT-proBNP compared to REVEAL equation alone.
